# Supplementary material for: Multi-color luminescence properties and energy transfer behaviour in host-sensitized CaWO4:Tb3+,Eu3+phosphors
Source: Royal Society of Chemistry journal article supplement (doi:10.1039/c6ra01862a), 2016-01-01
Supplement: c6ra01862a1.pdf [file c6ra01862a1.pdf]

## Supplementary Information for

# Multi-color luminescence properties and energy transfer behaviors in host-sensitized $\text{CaWO}_4:\text{Tb}^{3+}$ , $\text{Eu}^{3+}$ phosphors

Yang Zhang,<sup>a</sup> Weitao Gong,<sup>a</sup> Jingjie Yu,<sup>\*b</sup> Zhiyuan Cheng,<sup>b</sup> Guiling Ning<sup>\*a</sup>

<sup>a</sup> State Key Laboratory of Fine Chemicals, School of Chemical Engineering Dalian University of Technology, Dalian 116012, China

<sup>b</sup> Research Institute of Photonics, Dalian Polytechnic University, Dalian, 116034, P. R. China.

E-mail: [ninggl@dlut.edu.cn](mailto:ninggl@dlut.edu.cn)

[yujingjie@dpu.edu.cn](mailto:yujingjie@dpu.edu.cn)

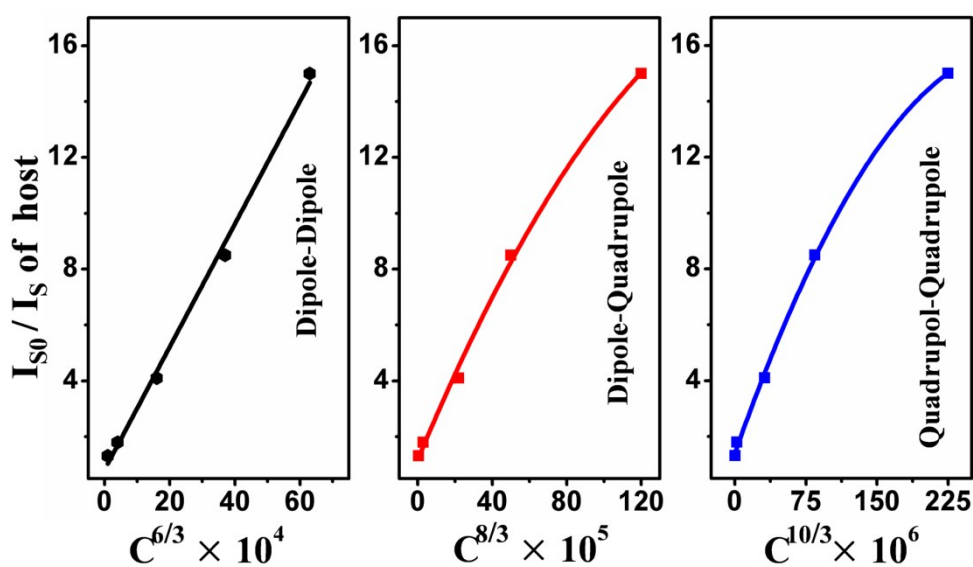

Fig. S1 Dependence of  $I_{S0}/I_S$  of host emission on (a)  $C_{\text{Tb}}^{6/3}$ , (b)  $C_{\text{Tb}}^{8/3}$ , and (c)  $C_{\text{Tb}}^{10/3}$ .

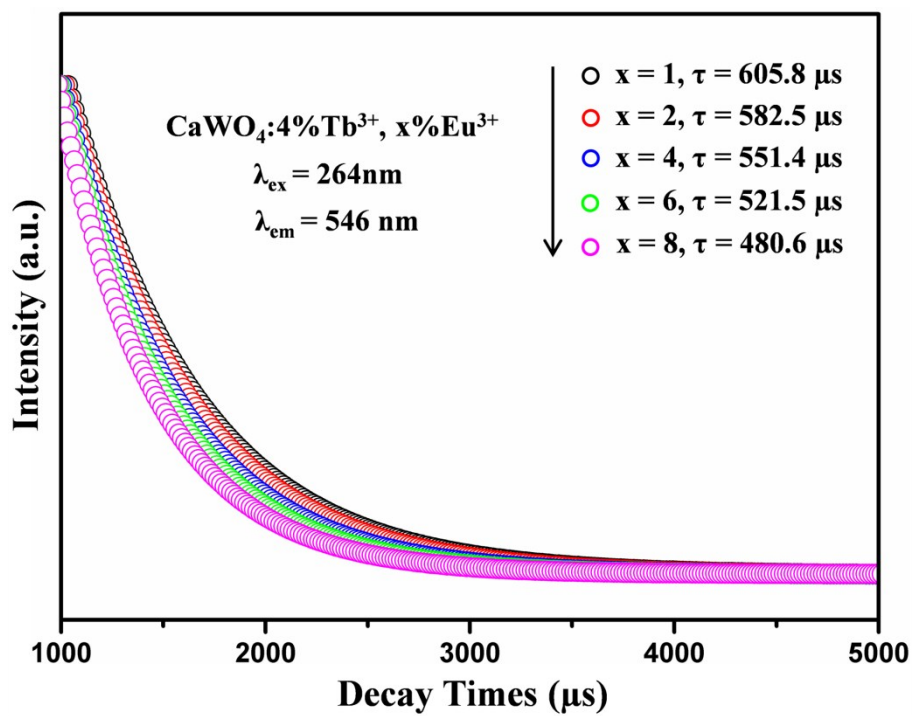

**Fig. S2** Photoluminescence decay curves of  $\text{Tb}^{3+}$  in  $\text{CaWO}_4:4\%\text{Tb}^{3+}, x\%\text{Eu}^{3+}$  with changing  $\text{Eu}^{3+}$  concentrations.
